# Supplementary material for: A highly conserved regulatory element controls hematopoietic expression of GATA-2 in zebrafish
Source: PubMed Central journal article supplement (PMC1988811; doi:10.1186/1471-213x-7-97), 2007-08-20
Supplement: 1471-213X-7-97-S3.pdf [file 1471-213X-7-97-S3.pdf]

### Additional file3

#### Mutation in LMO2 Binding Site Reduced GFP Hematopoietic Expression.

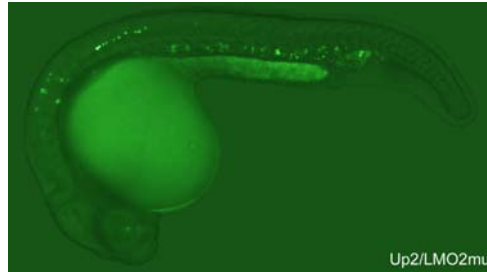

Figure S2. Transgenic zebrafish embryos carrying base change mutation in the binding site of LMO2 significantly reduced GFP hematopoietic expression.
